# Supplementary material
Source: publisher site journal article supplement (https://www.dovepress.com/article/246278)
Supplement: Supplementary file 1 [file get_supplementary_file.php]

**Supplementary Figure S1**


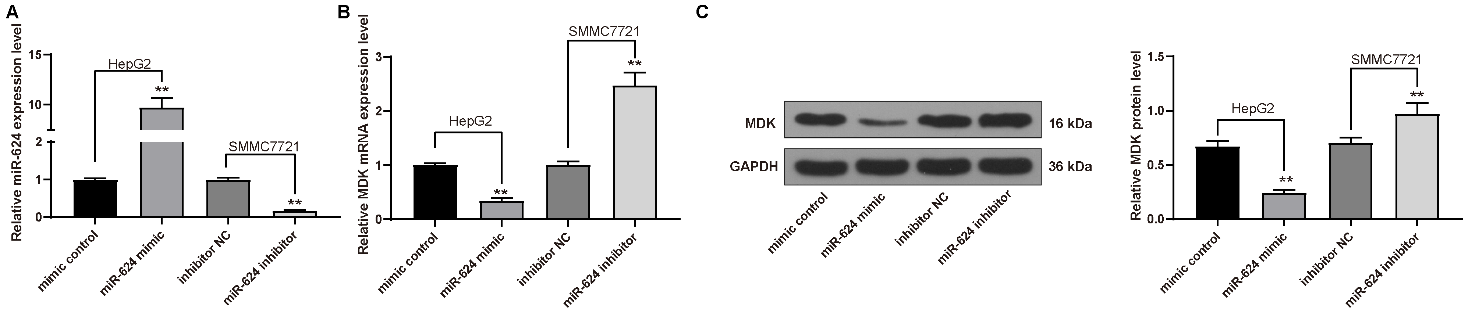


**Supplementary Figure S1** miR-624 suppresses the expression of MDK at both mRNA and protein level.HepG2 cells were delivered with miR-624 mimic or mimic control, while SMMC7721 cells were administrated with miR-624 inhibitor or inhibitor NC. A, miR-624 expression in HepG2 cells and SMMC7721 cells determined by RT-qPCR; B, MDK mRNA expression in HepG2 cells and SMMC7721 cells determined by RT-qPCR; C, MDK protein expression in HepG2 cells and SMMC7721 cells determined by western blot. The data are expressed as the mean ± SD. One-way or two-way ANOVA and Tukey’s multiple comparison test was used to determine statistical significance. ** *p* < 0.01.

**Supplementary Figure S2**

**
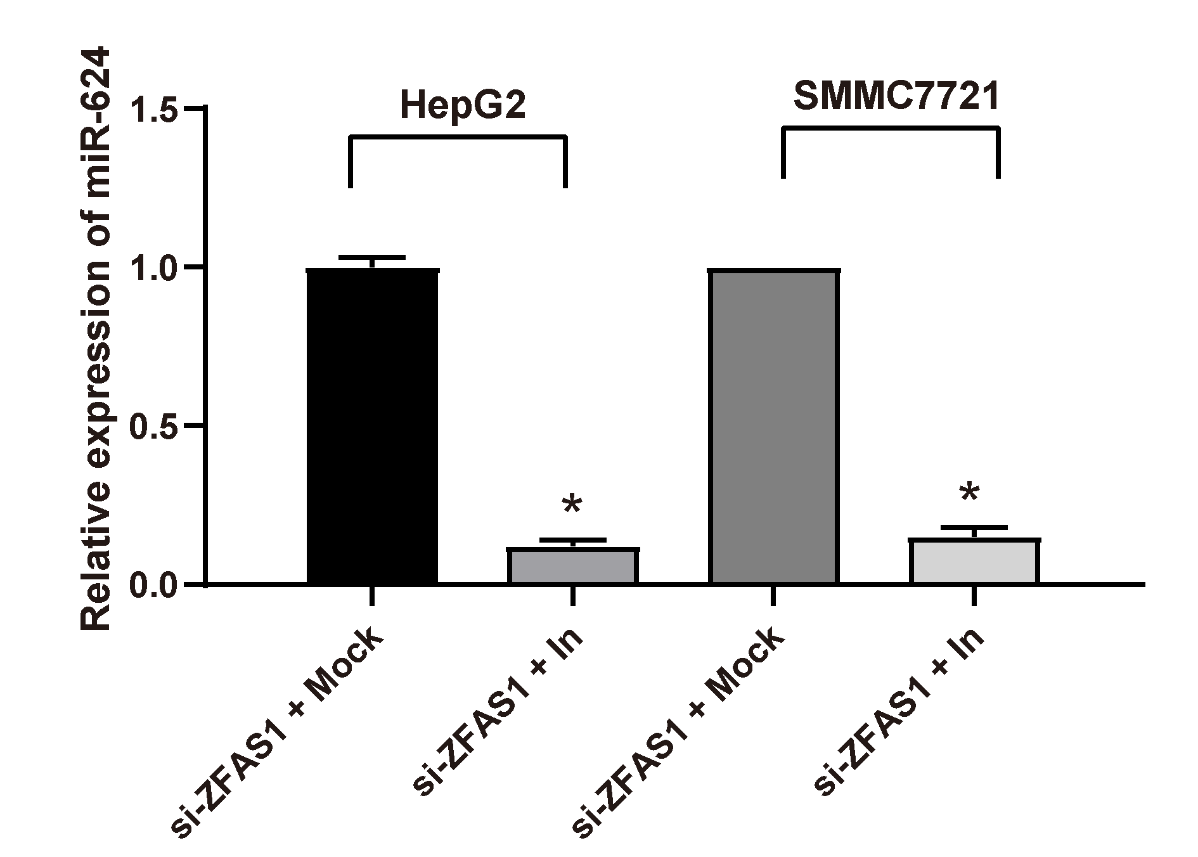
**

**Supplementary** **Figure S2.** RT-qPCR were performed to validate the transfection efficacy of miR-624 inhibitor or inhibitor control in the presence of si-ZFAS1.

**Supplementary Table S1** Primer sequences for RT-qPCR

| Targets | Forward (5’-3’) | Reverse (5’-3’) |
| --- | --- | --- |
| ZFAS1 | AGCGTTTGCTTTGTTCCC | CTCCCTCGATGCCCTTCT |
| miR-624 | TAAATGCCCGCTGTTTTGCT | TTGTCATCTGCCAGGACCAT |
| U6 | CTCGCTTCGGCAGCACA | AACGCTTCACGAATTTGCGT |
| GADPH | CGGACCAATACGACCAA | AGCCACATCGCTCAGACACC |
| MDK | GAAGGCAAGGTGGTATAATGG | ACAATCAAAGTCATCCGCAC |
| E-cadherin | TCACATCCTACACTGCCCAG | AGTGTCCCTGTTCCAGTAGC |
| Vimentin | GGACCAGCTAACCAACGACA | AAGGTCAAGACGTGCCAGAG |

Note: RT-qPCR, reverse transcription quantitative polymerase chain reaction; ZFAS1, ZNFX1 antisense RNA 1; miR-624, microRNA-624; GADPH, glyceraldehyde-3-phosphate dehydrogenase; MDK, Midkine.

|  |
| --- |
